# Supplementary material for: Differential item functioning of the SF-12 in a population-based regional joint replacement registry
Source: PubMed Central journal article supplement (PMC6604189; doi:10.1186/s12955-019-1166-1), 2019-07-02
Supplement: 12955_2019_1166_MOESM1_ESM.pdf [file 12955_2019_1166_MOESM1_ESM.pdf]

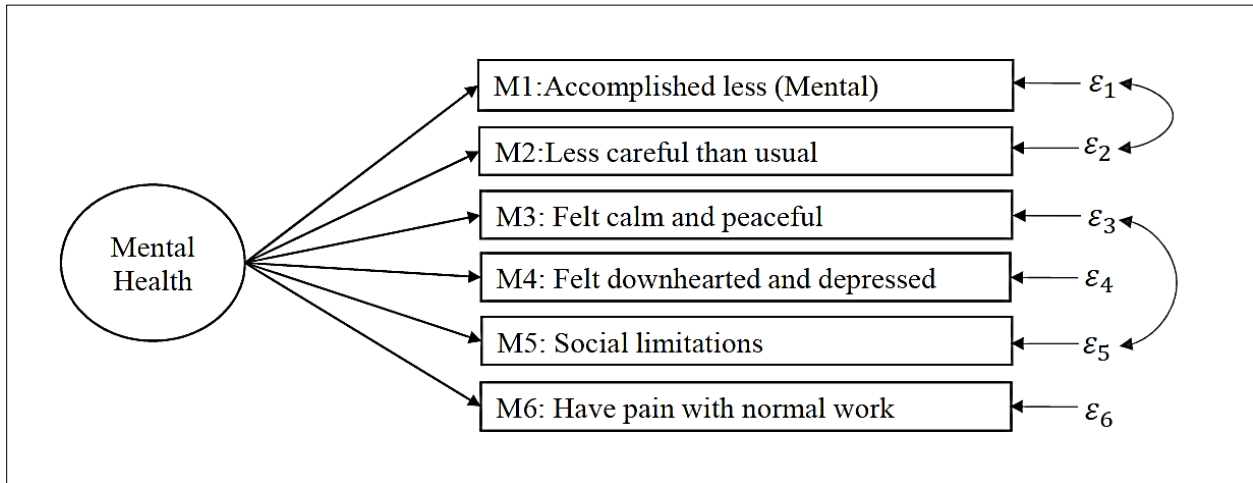

**Figure S1.** Baseline model for the SF-12 mental health sub-scale. M1-Role Functioning (Emotional): accomplished less (emotional problems); M2-Role Functioning (Emotional): less carefully than usual; M3-Mental Health: calm and peaceful; M4-Mental Health: downhearted and depressed; M5-Social Functioning: social limitations; M6-Bodily Pain: have pain with normal work

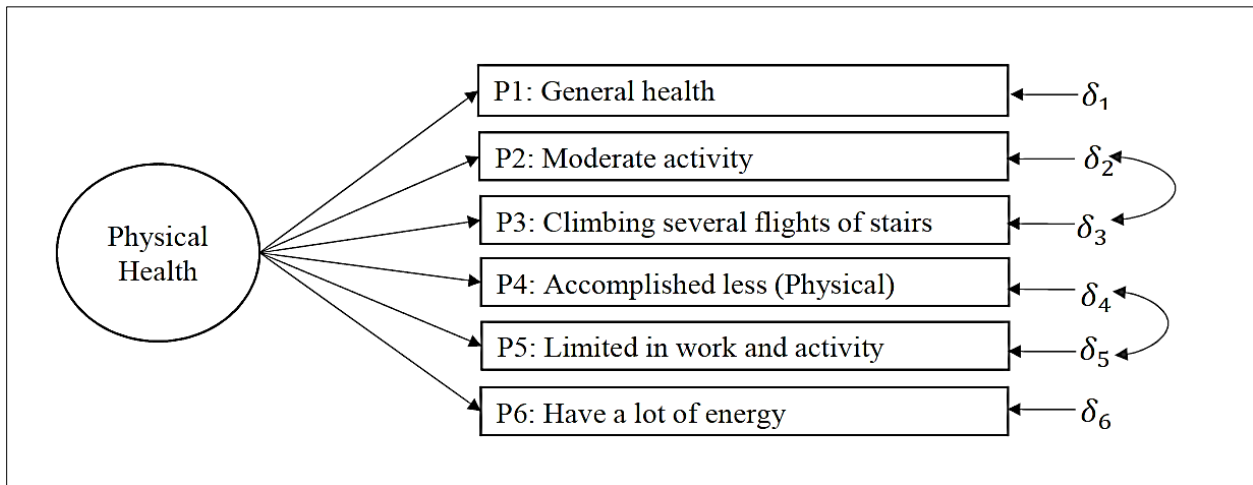

**Figure S2.** Baseline model for the SF-12 physical health sub-scale. P1-General Health: rating of general health; P2-Physical Functioning: moderate activities; P3-Physical Functioning: climbing several flights of stairs; P4-Role Functioning (Physical): accomplished less; P5-Role Functioning (Physical): limited in work or other activities; P6-Vitality: energy
