# Supplementary material for: Differential item functioning of the SF-12 in a population-based regional joint replacement registry
Source: PubMed Central journal article supplement (PMC6604189; doi:10.1186/s12955-019-1166-1), 2019-07-02
Supplement: 12955_2019_1166_MOESM2_ESM.pdf [file 12955_2019_1166_MOESM2_ESM.pdf]

**Table S1. Total effects of covariates on the SF-12 mental health sub-scale items for differential item functioning (DIF) and No-DIF models, stratified by type of joint replacement**

| Item | Covariate | THA          |      |              |      |       | TKA          |      |              |      |       |
|------|-----------|--------------|------|--------------|------|-------|--------------|------|--------------|------|-------|
|      |           | No-DIF Model |      | DIF Model    |      | d     | No-DIF Model |      | DIF Model    |      | d     |
|      |           | Est          | SE   | Est          | SE   |       | Est          | SE   | Est          | SE   |       |
| M1   | AGE1      | <b>0.16</b>  | 0.04 | <b>0.14</b>  | 0.05 | -0.30 | <b>0.26</b>  | 0.04 | <b>0.22</b>  | 0.04 | -0.15 |
| M1   | AGE2      | 0.08         | 0.04 | 0.01         | 0.05 | -0.90 | <b>0.26</b>  | 0.04 | <b>0.19</b>  | 0.05 | -0.42 |
| M1   | BMI1      | 0.07         | 0.05 | 0.02         | 0.06 | -0.76 | <b>0.14</b>  | 0.06 | 0.11         | 0.06 | -0.21 |
| M1   | BMI2      | <b>-0.19</b> | 0.04 | <b>-0.14</b> | 0.05 | -0.41 | <b>-0.15</b> | 0.04 | <b>-0.13</b> | 0.04 | -0.13 |
| M1   | SEX       | <b>0.29</b>  | 0.04 | <b>0.19</b>  | 0.04 | -0.34 | <b>0.28</b>  | 0.03 | <b>0.18</b>  | 0.04 | -0.52 |
| M1   | COMORB    | <b>-0.53</b> | 0.04 | <b>-0.48</b> | 0.05 | -0.28 | <b>-0.49</b> | 0.03 | <b>-0.41</b> | 0.04 | -0.37 |
| M2   | AGE1      | <b>0.14</b>  | 0.04 | 0.05         | 0.05 | -0.71 | <b>0.22</b>  | 0.03 | <b>0.13</b>  | 0.04 | -0.56 |
| M2   | AGE2      | 0.07         | 0.04 | -0.10        | 0.05 | -2.14 | <b>0.22</b>  | 0.03 | 0.02         | 0.04 | -0.93 |
| M2   | BMI1      | 0.06         | 0.04 | 0.04         | 0.06 | -0.56 | <b>0.12</b>  | 0.05 | 0.10         | 0.06 | -0.31 |
| M2   | BMI2      | <b>-0.17</b> | 0.04 | <b>-0.17</b> | 0.05 | -0.20 | <b>-0.13</b> | 0.03 | <b>-0.13</b> | 0.04 | -0.25 |
| M2   | SEX       | <b>0.25</b>  | 0.03 | <b>0.19</b>  | 0.04 | -0.43 | <b>0.24</b>  | 0.03 | <b>0.18</b>  | 0.03 | -0.25 |
| M2   | COMORB    | <b>-0.47</b> | 0.04 | <b>-0.42</b> | 0.04 | -0.11 | <b>-0.43</b> | 0.03 | <b>-0.31</b> | 0.04 | -0.46 |
| M3   | AGE1      | <b>0.11</b>  | 0.03 | <b>0.20</b>  | 0.04 | 0.36  | <b>0.16</b>  | 0.02 | <b>0.23</b>  | 0.03 | -0.04 |
| M3   | AGE2      | 0.05         | 0.03 | <b>0.26</b>  | 0.04 | 2.90  | <b>0.16</b>  | 0.02 | <b>0.31</b>  | 0.03 | 0.29  |
| M3   | BMI1      | 0.05         | 0.03 | 0.09         | 0.05 | 0.08  | <b>0.09</b>  | 0.03 | 0.08         | 0.05 | -0.47 |
| M3   | BMI2      | <b>-0.13</b> | 0.03 | <b>-0.08</b> | 0.04 | -0.54 | <b>-0.09</b> | 0.02 | -0.02        | 0.03 | -0.85 |
| M3   | SEX       | <b>0.20</b>  | 0.02 | <b>0.25</b>  | 0.03 | -0.17 | <b>0.17</b>  | 0.02 | <b>0.25</b>  | 0.03 | -0.02 |
| M3   | COMORB    | <b>-0.35</b> | 0.03 | <b>-0.38</b> | 0.04 | -0.19 | <b>-0.29</b> | 0.02 | <b>-0.32</b> | 0.03 | -0.26 |
| M4   | AGE1      | <b>0.08</b>  | 0.02 | 0.02         | 0.04 | -0.88 | <b>0.12</b>  | 0.02 | <b>0.20</b>  | 0.03 | 0.11  |
| M4   | AGE2      | 0.04         | 0.02 | <b>-0.10</b> | 0.04 | -2.25 | <b>0.12</b>  | 0.02 | <b>0.14</b>  | 0.04 | -0.42 |
| M4   | BMI1      | 0.03         | 0.02 | -0.02        | 0.05 | -1.27 | <b>0.07</b>  | 0.03 | 0.06         | 0.05 | -0.49 |
| M4   | BMI2      | <b>-0.09</b> | 0.02 | <b>-0.21</b> | 0.04 | 0.17  | <b>-0.07</b> | 0.02 | <b>-0.21</b> | 0.03 | 1.00  |
| M4   | SEX       | <b>0.14</b>  | 0.02 | <b>0.37</b>  | 0.03 | 0.76  | <b>0.13</b>  | 0.01 | <b>0.22</b>  | 0.03 | -0.44 |
| M4   | COMORB    | <b>-0.24</b> | 0.02 | <b>-0.34</b> | 0.03 | -0.06 | <b>-0.21</b> | 0.02 | <b>-0.39</b> | 0.03 | 0.24  |
| M5   | AGE1      | <b>0.12</b>  | 0.03 | <b>0.15</b>  | 0.04 | -0.06 | <b>0.20</b>  | 0.03 | <b>0.20</b>  | 0.03 | 0.00  |
| M5   | AGE2      | 0.06         | 0.03 | <b>0.09</b>  | 0.04 | 0.13  | <b>0.21</b>  | 0.03 | <b>0.24</b>  | 0.03 | 0.14  |
| M5   | BMI1      | 0.05         | 0.04 | 0.08         | 0.04 | 0.60  | <b>0.11</b>  | 0.04 | <b>0.15</b>  | 0.05 | 0.09  |
| M5   | BMI2      | <b>-0.15</b> | 0.03 | <b>-0.15</b> | 0.04 | -0.25 | <b>-0.12</b> | 0.03 | <b>-0.11</b> | 0.03 | -0.08 |
| M5   | SEX       | <b>0.22</b>  | 0.03 | <b>0.19</b>  | 0.03 | -0.14 | <b>0.22</b>  | 0.02 | <b>0.22</b>  | 0.03 | -0.33 |
| M5   | COMORB    | <b>-0.40</b> | 0.03 | <b>-0.39</b> | 0.03 | -0.02 | <b>-0.39</b> | 0.03 | <b>-0.40</b> | 0.03 | 0.03  |

|    |        |              |      |              |      |       |              |      |              |      |       |
|----|--------|--------------|------|--------------|------|-------|--------------|------|--------------|------|-------|
| M6 | AGE1   | <b>0.13</b>  | 0.04 | <b>0.16</b>  | 0.04 | 0.23  | <b>0.21</b>  | 0.03 | <b>0.21</b>  | 0.03 | 0.00  |
| M6 | AGE2   | 0.06         | 0.04 | <b>0.10</b>  | 0.04 | 0.67  | <b>0.21</b>  | 0.03 | <b>0.25</b>  | 0.04 | -0.11 |
| M6 | BMI1   | 0.06         | 0.04 | 0.09         | 0.04 | 0.50  | <b>0.12</b>  | 0.05 | <b>0.15</b>  | 0.05 | 0.25  |
| M6 | BMI2   | <b>-0.15</b> | 0.03 | <b>-0.16</b> | 0.04 | -0.20 | <b>-0.12</b> | 0.03 | <b>-0.12</b> | 0.03 | 0.00  |
| M6 | SEX    | <b>0.24</b>  | 0.03 | <b>0.21</b>  | 0.03 | -0.13 | <b>0.23</b>  | 0.03 | <b>0.23</b>  | 0.03 | 0.00  |
| M6 | COMORB | <b>-0.41</b> | 0.03 | <b>-0.40</b> | 0.03 | -0.02 | <b>-0.39</b> | 0.03 | <b>-0.40</b> | 0.03 | 0.03  |

Note: AGE1 = 0 if age  $\leq$  60 and 1 otherwise; AGE2 = 0 if age  $\leq$  70 and 1 otherwise; BMI1= 0 if BMI  $\leq$  25.0 and 1 otherwise; BMI2 = 0 if BMI  $\leq$  30.0 and 1 otherwise; COMORB = 0 if < 2 comorbid conditions and 1 otherwise; EST=estimate; SE= standard error; d=relative difference in standardized estimates between DIF model and No-DIF models; Boldface font is used to denote statistically significant estimates at  $\alpha=0.05$ .

**Table S2. Total effects of covariates on the SF-12 physical health sub-scale items for differential item functioning (DIF) and No-DIF models, stratified by type of joint replacement**

| Item | Covariate | THA          |      |              |      |       | TKA          |      |              |      |       |
|------|-----------|--------------|------|--------------|------|-------|--------------|------|--------------|------|-------|
|      |           | No-DIF Model |      | DIF Model    |      | d     | No-DIF Model |      | DIF Model    |      | d     |
|      |           | Est          | SE   | Est          | SE   |       | Est          | SE   | Est          | SE   |       |
| P1   | AGE1      | 0.01         | 0.01 | <b>0.08</b>  | 0.03 | 1.67  | <b>0.05</b>  | 0.01 | <b>0.11</b>  | 0.03 | -0.27 |
| P1   | AGE2      | <b>-0.02</b> | 0.01 | <b>-0.08</b> | 0.03 | 0.33  | <b>0.04</b>  | 0.01 | <b>0.09</b>  | 0.03 | -0.25 |
| P1   | BMI1      | -0.01        | 0.01 | 0.00         | 0.04 | -1.00 | <b>0.02</b>  | 0.01 | -0.02        | 0.04 | -1.25 |
| P1   | BMI2      | <b>-0.04</b> | 0.01 | <b>-0.26</b> | 0.03 | 1.17  | <b>-0.05</b> | 0.01 | <b>-0.19</b> | 0.03 | 0.27  |
| P1   | SEX       | <b>0.05</b>  | 0.01 | 0.02         | 0.03 | -0.87 | <b>0.04</b>  | 0.01 | 0.04         | 0.02 | -0.50 |
| P1   | COMORB    | <b>-0.06</b> | 0.01 | <b>-0.45</b> | 0.03 | 1.50  | <b>-0.06</b> | 0.01 | <b>-0.51</b> | 0.02 | 3.25  |
| P2   | AGE1      | 0.03         | 0.02 | 0.04         | 0.02 | 0.33  | <b>0.11</b>  | 0.02 | <b>0.11</b>  | 0.02 | 0.00  |
| P2   | AGE2      | <b>-0.04</b> | 0.02 | <b>-0.05</b> | 0.02 | 0.25  | <b>0.09</b>  | 0.02 | <b>0.08</b>  | 0.02 | -0.11 |
| P2   | BMI1      | -0.02        | 0.02 | -0.02        | 0.02 | 0.00  | <b>0.05</b>  | 0.02 | 0.04         | 0.03 | -0.47 |
| P2   | BMI2      | <b>-0.09</b> | 0.02 | <b>-0.07</b> | 0.02 | -0.22 | <b>-0.11</b> | 0.01 | <b>-0.09</b> | 0.02 | -0.59 |
| P2   | SEX       | <b>0.13</b>  | 0.02 | <b>0.15</b>  | 0.02 | 0.15  | <b>0.10</b>  | 0.01 | <b>0.10</b>  | 0.02 | -0.50 |
| P2   | COMORB    | <b>-0.12</b> | 0.01 | <b>-0.12</b> | 0.02 | -0.50 | <b>-0.14</b> | 0.01 | <b>-0.13</b> | 0.02 | -0.54 |
| P3   | AGE1      | 0.03         | 0.02 | 0.00         | 0.03 | -1.00 | <b>0.06</b>  | 0.01 | <b>0.06</b>  | 0.02 | -0.50 |
| P3   | AGE2      | <b>-0.04</b> | 0.02 | <b>-0.06</b> | 0.03 | 0.00  | <b>0.05</b>  | 0.01 | 0.03         | 0.02 | -0.70 |
| P3   | BMI1      | -0.02        | 0.02 | -0.03        | 0.03 | 0.00  | <b>0.03</b>  | 0.01 | 0.00         | 0.03 | -1.00 |
| P3   | BMI2      | <b>-0.07</b> | 0.01 | <b>-0.10</b> | 0.02 | -0.29 | <b>-0.06</b> | 0.01 | <b>-0.07</b> | 0.02 | -0.42 |
| P3   | SEX       | <b>0.11</b>  | 0.01 | <b>0.21</b>  | 0.03 | -0.36 | <b>0.06</b>  | 0.01 | <b>0.18</b>  | 0.02 | 0.50  |
| P3   | COMORB    | <b>-0.11</b> | 0.01 | <b>-0.10</b> | 0.02 | -0.55 | <b>-0.07</b> | 0.01 | <b>-0.07</b> | 0.01 | 0.00  |
| P4   | AGE1      | 0.07         | 0.04 | 0.06         | 0.04 | -0.14 | <b>0.22</b>  | 0.03 | <b>0.16</b>  | 0.04 | -0.45 |
| P4   | AGE2      | <b>-0.11</b> | 0.04 | <b>-0.13</b> | 0.05 | -0.05 | <b>0.18</b>  | 0.03 | <b>0.14</b>  | 0.04 | -0.42 |
| P4   | BMI1      | -0.05        | 0.05 | -0.05        | 0.05 | 0.00  | <b>0.10</b>  | 0.05 | <b>0.14</b>  | 0.05 | 0.40  |
| P4   | BMI2      | <b>-0.21</b> | 0.04 | <b>-0.19</b> | 0.04 | -0.10 | <b>-0.23</b> | 0.03 | <b>-0.24</b> | 0.03 | 0.04  |
| P4   | SEX       | <b>0.30</b>  | 0.04 | <b>0.23</b>  | 0.04 | -0.23 | <b>0.20</b>  | 0.03 | <b>0.14</b>  | 0.03 | -0.30 |
| P4   | COMORB    | <b>-0.31</b> | 0.03 | <b>-0.26</b> | 0.04 | -0.37 | <b>-0.29</b> | 0.03 | <b>-0.24</b> | 0.03 | -0.17 |
| P5   | AGE1      | 0.07         | 0.04 | 0.07         | 0.04 | 0.00  | <b>0.22</b>  | 0.03 | <b>0.23</b>  | 0.03 | 0.05  |
| P5   | AGE2      | <b>-0.10</b> | 0.04 | -0.03        | 0.04 | -0.70 | <b>0.18</b>  | 0.03 | <b>0.26</b>  | 0.04 | 0.08  |
| P5   | BMI1      | -0.05        | 0.04 | -0.05        | 0.05 | -0.20 | <b>0.10</b>  | 0.05 | <b>0.13</b>  | 0.05 | 0.30  |
| P5   | BMI2      | <b>-0.20</b> | 0.03 | <b>-0.19</b> | 0.04 | -0.29 | <b>-0.22</b> | 0.03 | <b>-0.19</b> | 0.03 | -0.14 |
| P5   | SEX       | <b>0.28</b>  | 0.03 | <b>0.21</b>  | 0.04 | -0.44 | <b>0.19</b>  | 0.03 | <b>0.13</b>  | 0.03 | -0.32 |
| P5   | COMORB    | <b>-0.29</b> | 0.03 | <b>-0.25</b> | 0.03 | -0.14 | <b>-0.28</b> | 0.03 | <b>-0.22</b> | 0.03 | -0.21 |

|    |        |              |      |              |      |       |              |      |              |      |       |
|----|--------|--------------|------|--------------|------|-------|--------------|------|--------------|------|-------|
| P6 | AGE1   | 0.06         | 0.03 | 0.07         | 0.04 | -0.13 | <b>0.17</b>  | 0.03 | <b>0.18</b>  | 0.03 | 0.06  |
| P6 | AGE2   | <b>-0.09</b> | 0.03 | <b>-0.09</b> | 0.04 | -0.25 | <b>0.14</b>  | 0.03 | <b>0.13</b>  | 0.03 | -0.07 |
| P6 | BMI1   | -0.04        | 0.04 | -0.04        | 0.04 | 0.00  | <b>0.08</b>  | 0.04 | 0.06         | 0.04 | -0.25 |
| P6 | BMI2   | <b>-0.17</b> | 0.03 | <b>-0.13</b> | 0.03 | -0.24 | <b>-0.18</b> | 0.02 | <b>-0.15</b> | 0.03 | -0.44 |
| P6 | SEX    | <b>0.24</b>  | 0.03 | <b>0.27</b>  | 0.03 | 0.13  | <b>0.15</b>  | 0.02 | <b>0.16</b>  | 0.02 | 0.07  |
| P6 | COMORB | <b>-0.25</b> | 0.03 | <b>-0.23</b> | 0.03 | -0.08 | <b>-0.23</b> | 0.02 | <b>-0.21</b> | 0.02 | -0.09 |

Note: AGE1 = 0 if age  $\leq$  60 and 1 otherwise; AGE2 = 0 if age  $\leq$  70 and 1 otherwise; BMI1= 0 if BMI  $\leq$  25.0 and 1 otherwise; BMI2 = 0 if BMI  $\leq$  30.0 and 1 otherwise; COMORB = 0 if < 2 comorbid conditions and 1 otherwise; EST=estimate; SE= standard error; d=relative difference in standardized estimates between DIF model and No-DIF models; Boldface font is used to denote statistically significant estimates at  $\alpha=0.05$ .
